# Supplementary material for: A lost piece of the puzzle of the alkane cracking mechanism: a carbanion pathway on a solid base catalyst
Source: Royal Society of Chemistry journal article supplement (doi:10.1039/d4ra00878b), 2024-01-01
Supplement: d4ra00878b1.pdf [file d4ra00878b1.pdf]

## Supporting Information

### A lost piece of puzzle on alkane cracking mechanism: a carbanion pathway on solid base catalyst

Zhixuan Zuo <sup>at</sup>, Yuchen Sha<sup>at</sup>, Ruoyu Wang <sup>at</sup>, Lixin Wang <sup>a</sup>, Haitao Song <sup>a</sup>, Peng Wang <sup>a\*</sup>, Zhijian Da <sup>a\*</sup>

<sup>a</sup> Sinopec Research Institute of Petroleum Processing CO.,LTD, No. 18 Xueyuan Road, Haidian District, Beijing 100083, P.R. China.

**Table S1.** General information on indicators for measuring basic strength.

| Indicators              | Acid color | Base color         | pK <sub>a</sub> /H. |
|-------------------------|------------|--------------------|---------------------|
| Bromothymol blue        | Yellow     | Green              | 7.2                 |
| 4-Chloro-2-nitroaniline | Yellow     | Orange             | 17.2                |
| 4-Nitroaniline          | Colorless  | Orange             | 18.4                |
| 4-Chloroaniline         | Colorless  | Pink               | 26.5                |
| Diphenylmethane         | Colorless  | Yellowish ~ orange | 35                  |

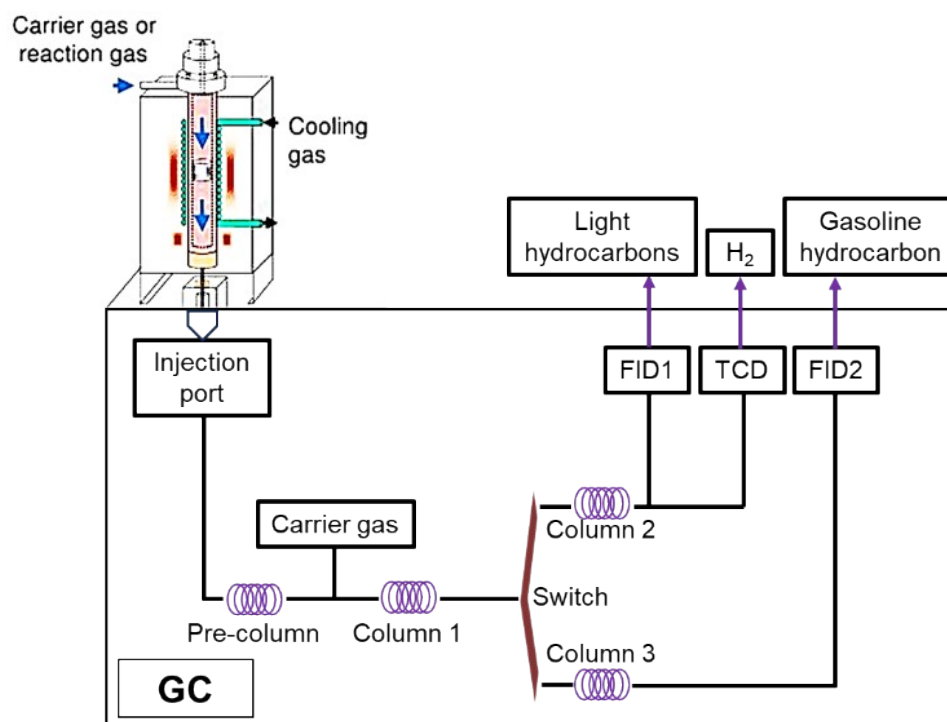

**Figure S1.** Scheme of the experimental device for catalytic performance testing of catalysts

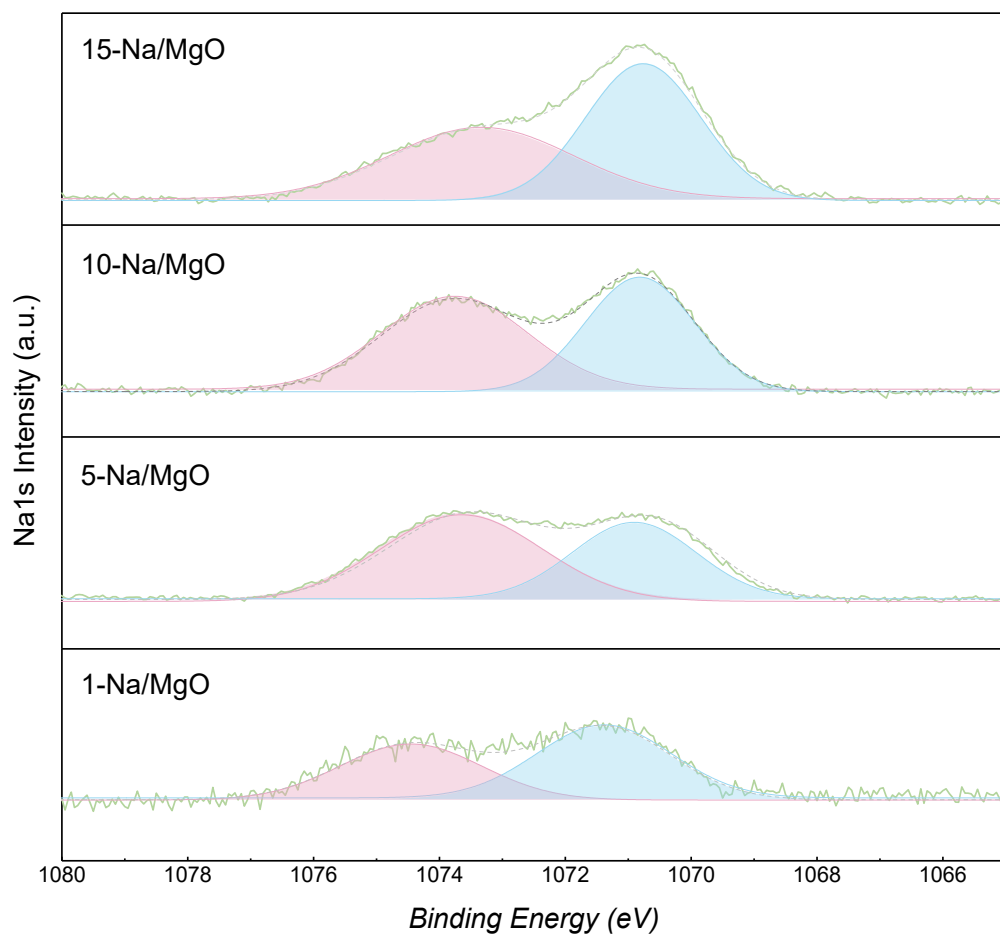

**Figure S2.** Na1s XPS spectra for series of Na/MgO samples

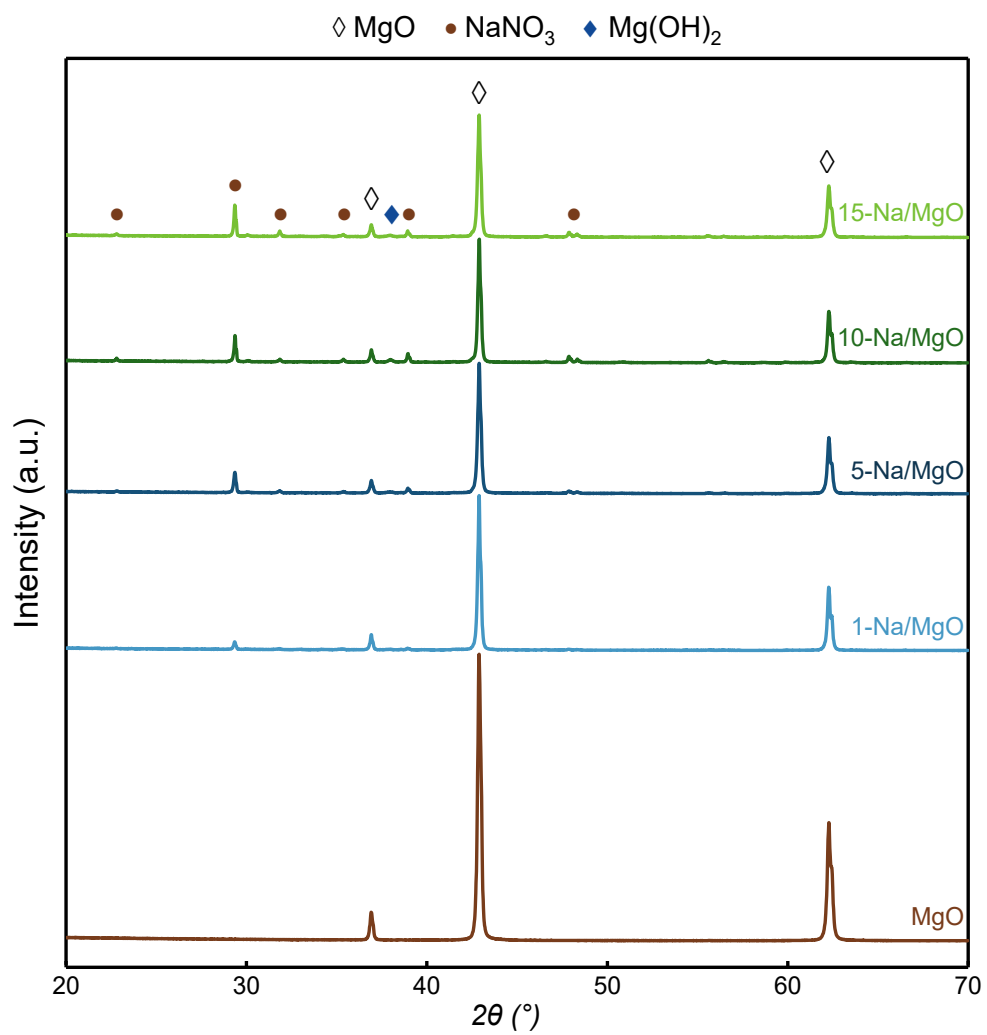

**Figure S3.** XRD patterns of a series of Na/MgO samples

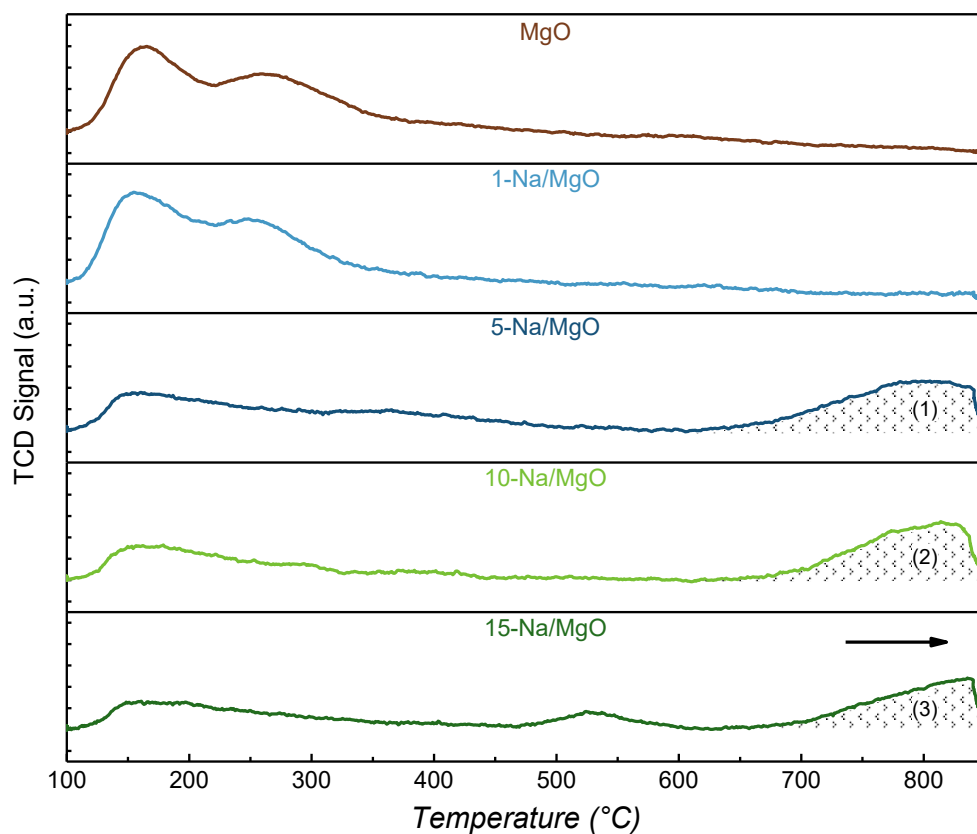

**Figure S4.** CO<sub>2</sub>-TPD profiles of a series of Na/MgO samples

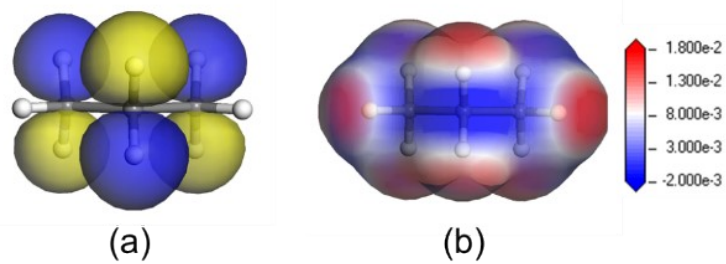

**Figure S5.** Distribution of propane molecule for (a) highest occupied molecular orbitals and (b) electric potential.
